# Supplementary material for: Effects and individual response of salt substitute intervention on blood pressure in a high-risk stroke population: findings from 4200 participants of the China Salt Substitute and Stroke Study
Source: Royal Society of Chemistry journal article supplement (doi:10.1039/d4fo02917h), 2024-01-01
Supplement: d4fo02917h1.pdf [file d4fo02917h1.pdf]

**SUPPLEMENT MATERIALS**

Table S1. Characteristics of participants at terminal visit

| Characteristics                    | Total        | Salt substitute | Regular salt | <i>P</i> value |
|------------------------------------|--------------|-----------------|--------------|----------------|
| N                                  | 3,095        | 1,591           | 1,504        |                |
| Age (years)                        | 62.26±8.6    | 61.90±8.68      | 62.64±8.50   | 0.017          |
| Gender                             |              |                 |              | 0.933          |
| Male (n, %)                        | 1482(47.9%)  | 763(48%)        | 719(41.8%)   |                |
| Female (n, %)                      | 1613(52.1%)  | 828(58%)        | 785(52.5%)   |                |
| BMI (kg/m <sup>2</sup> )           | 24.44±3.49   | 24.48±3.41      | 24.40±3.57   | 0.498          |
| Smoking (n, %)                     | 1019(32.9%)  | 509(32%)        | 510(33.9%)   | 0.257          |
| <i>Education</i>                   |              |                 |              | 0.041          |
| Primary school or lower (n, %)     | 1900(61.4%)  | 949(59.6%)      | 951(63.2%)   |                |
| Junior high school or above (n, %) | 1195(38.6%)  | 642(40.4%)      | 553(36.8%)   |                |
| SBP (mmHg)                         | 146.86±21.32 | 145.48±21.53    | 148.33±20.99 | <0.001         |
| DBP (mmHg)                         | 89.37±12.47  | 88.93±12.23     | 89.84±12.71  | 0.045          |
| <i>History of diseases</i>         |              |                 |              |                |
| Stroke (n, %)                      | 2866(92.6%)  | 1476(92.8%)     | 1390(92.4%)  | 0.709          |
| TIA (n, %)                         | 1558(50.3%)  | 754(47.4%)      | 804(53.5%)   | 0.001          |
| IHD (n, %)                         | 323(10.4%)   | 154(9.7%)       | 169(11.2%)   | 0.157          |
| CHF (n, %)                         | 37(1.2%)     | 6(0.4%)         | 31(2.4%)     | <0.001         |
| PAD (n, %)                         | 61(2.0%)     | 48(3%)          | 13(0.9%)     | <0.001         |
| Hypertension (n, %)                | 2408(77.8%)  | 1263(79.4%)     | 1145(76.1%)  | 0.029          |
| Diabetes (n, %)                    | 229(7.4%)    | 117(7.4%)       | 112(1.4%)    | 0.921          |
| <i>Medication history</i>          |              |                 |              |                |
| Antihypertensive drug (n, %)       | 1942(62.7%)  | 965(60.7%)      | 977(65%)     | 0.013          |
| Lipid-lowering drug (n, %)         | 95(3.1%)     | 43(2.7%)        | 52(3.5%)     | 0.224          |
| Antiplatelet drug (n, %)           | 537(17.4%)   | 262(12.5%)      | 275(18.3%)   | 0.182          |
| Anticoagulant drug (n, %)          | 33(1.1%)     | 13(0.8%)        | 20(1.3%)     | 0.165          |

(Data were expressed as mean (SD) or n (%) for continuous and category data, respectively. BMI, body mass index; CHF: congestive heart failure; DBP, diastolic blood pressure; IHD, ischemic heart disease; PAD, peripheral arterial disease; SBP, systolic blood pressure; TIA, transient ischemic attacks. )

Table S2. Measurements of Na<sup>+</sup> and K<sup>+</sup> at each visit

|        | Na (mmol/L)     |              |          | K (mmol/L)      |              |          |
|--------|-----------------|--------------|----------|-----------------|--------------|----------|
|        | Salt substitute | Regular salt | <i>P</i> | Salt substitute | Regular salt | <i>P</i> |
| 1 year | 155.64±57.18    | 158.60±52.02 | 0.705    | 63.12±27.39     | 53.28±22.29  | 0.007    |
| 2 year | 139.77±54.12    | 140.68±54.53 | 0.901    | 52.76±30.30     | 36.94±17.22  | <0.001   |
| 3 year | 139.31±59.87    | 139.59±68.19 | 0.976    | 58.87±29.77     | 41.48±23.08  | <0.001   |
| 4 year | 130.32±48.09    | 138.78±50.79 | 0.250    | 48.44±24.18     | 37.23±18.08  | <0.001   |
| 5 year | 134.63±53.45    | 141.77±64.45 | 0.398    | 51.47±23.86     | 43.74±24.47  | 0.025    |

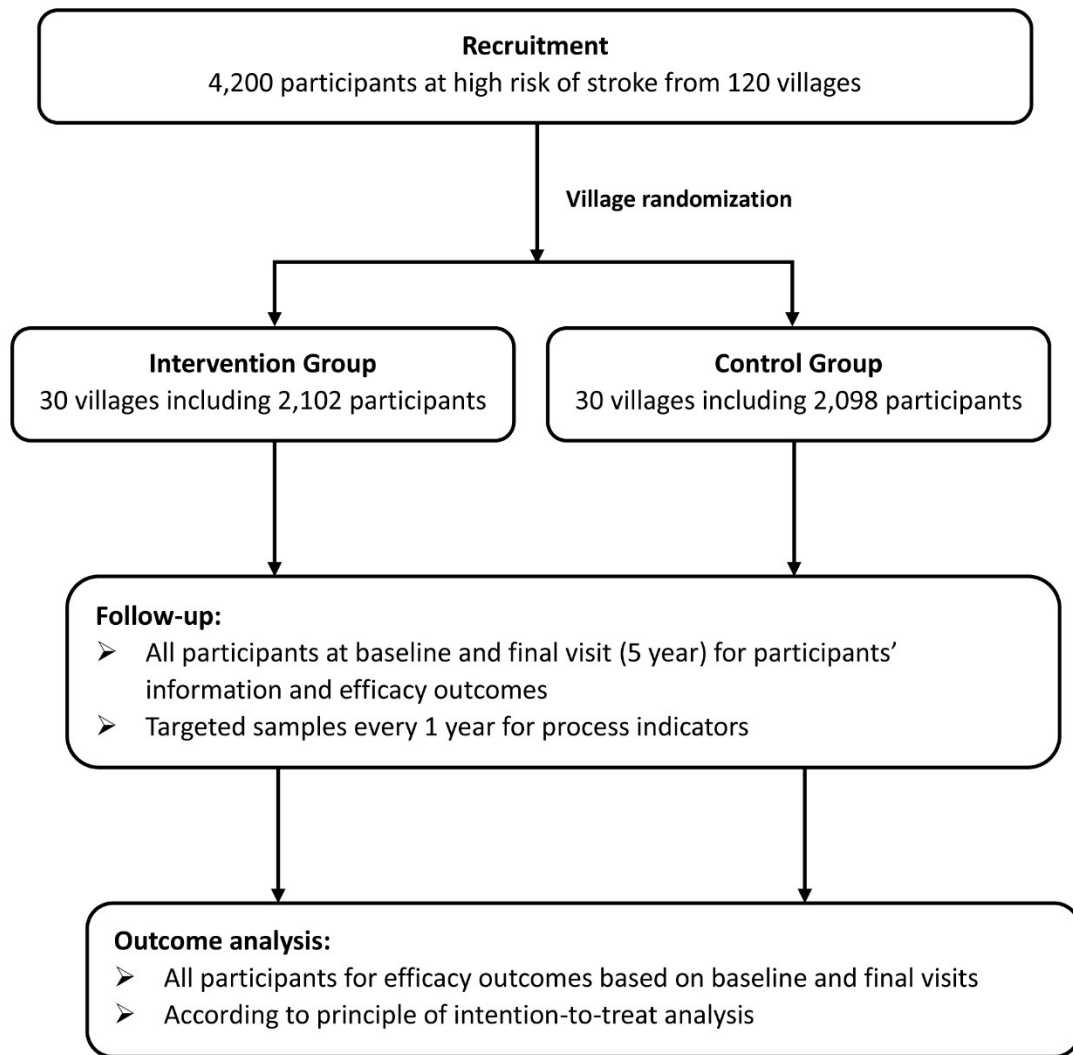

Supplementary Figure S1. Flowchart of participant recruitment and follow-up.

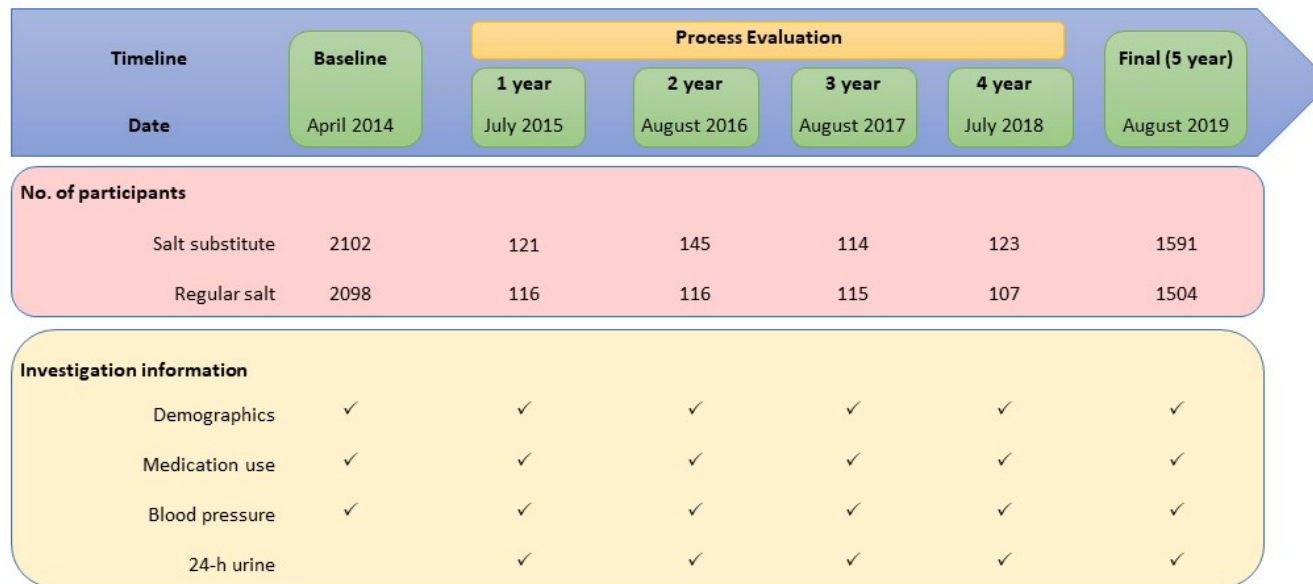

Supplementary Figure S2. Flowchart and specific information during follow-up visits.

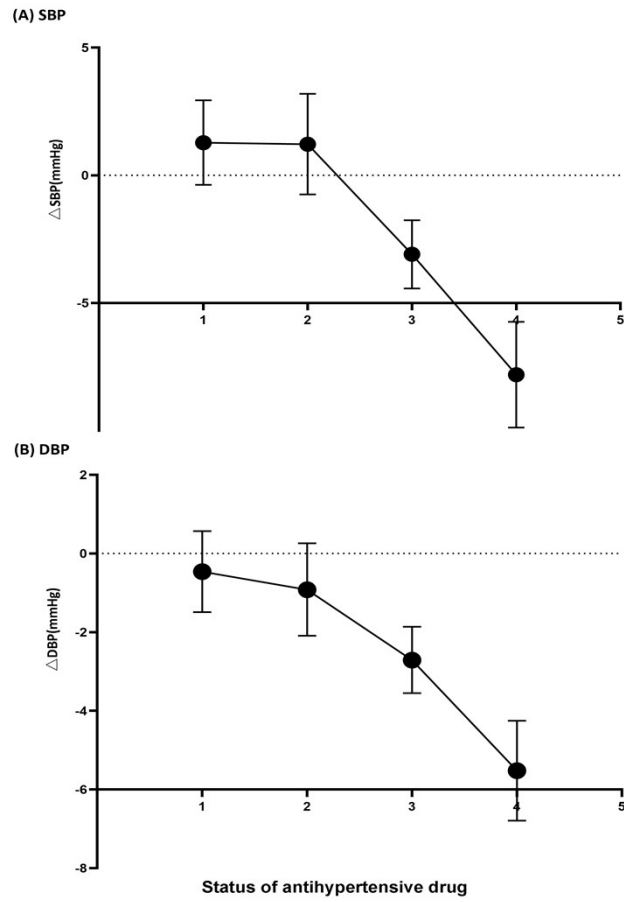

Supplementary Figure S3. Blood pressure change according to antihypertensive drug status. ( $\Delta$ SBP=SBP at endpoint - SBP at baseline;  $\Delta$ DBP=DBP at endpoint - DBP at baseline. Status of antihypertensive drug: Status 1, Not using antihypertensive drug at baseline and endpoint; Status 2, Using antihypertensive drug at baseline but not at endpoint; Status 3, Using antihypertensive drug at baseline and endpoint; Status 4, Using antihypertensive drug at endpoint but not at baseline.)

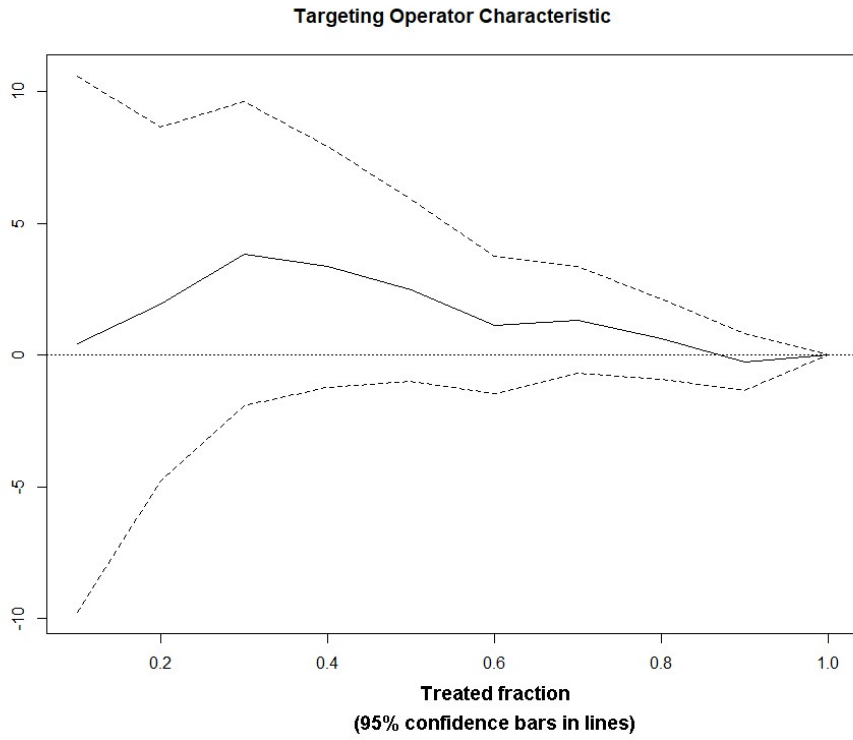

Supplementary Figure S4. Targeting operator characteristics estimates.

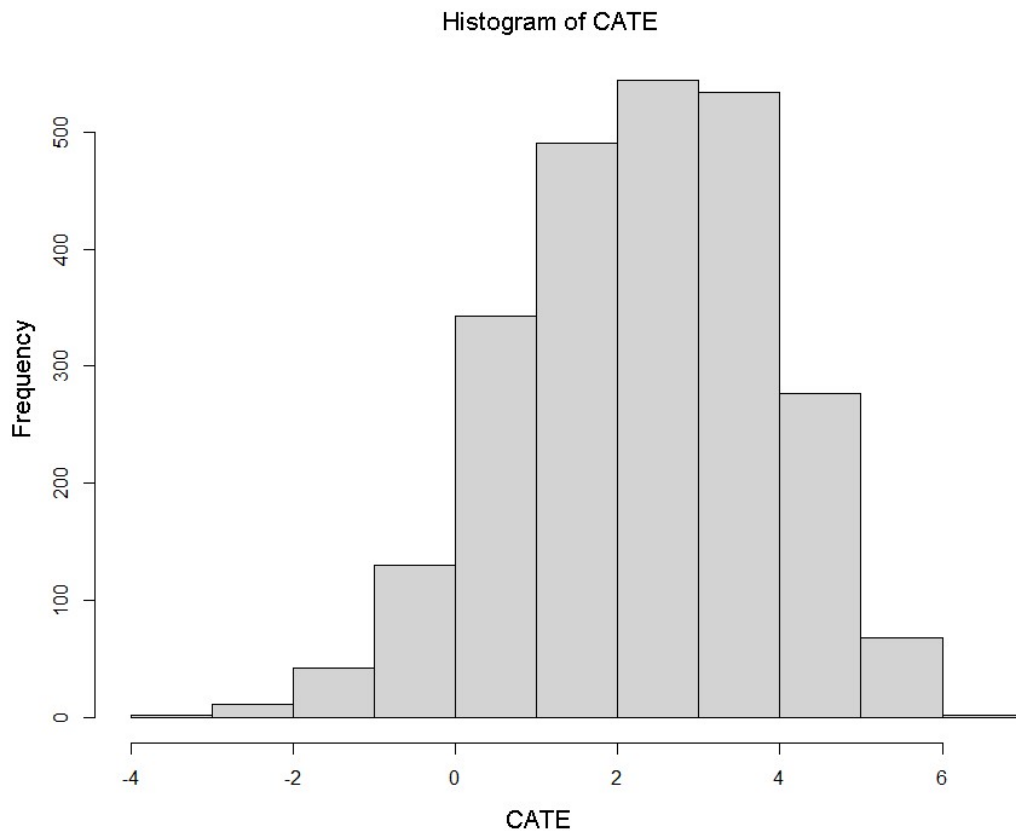

Supplementary Figure S5. Histogram of out-of-bag CATE estimates.  
(CATE: conditional average treatment effect.)

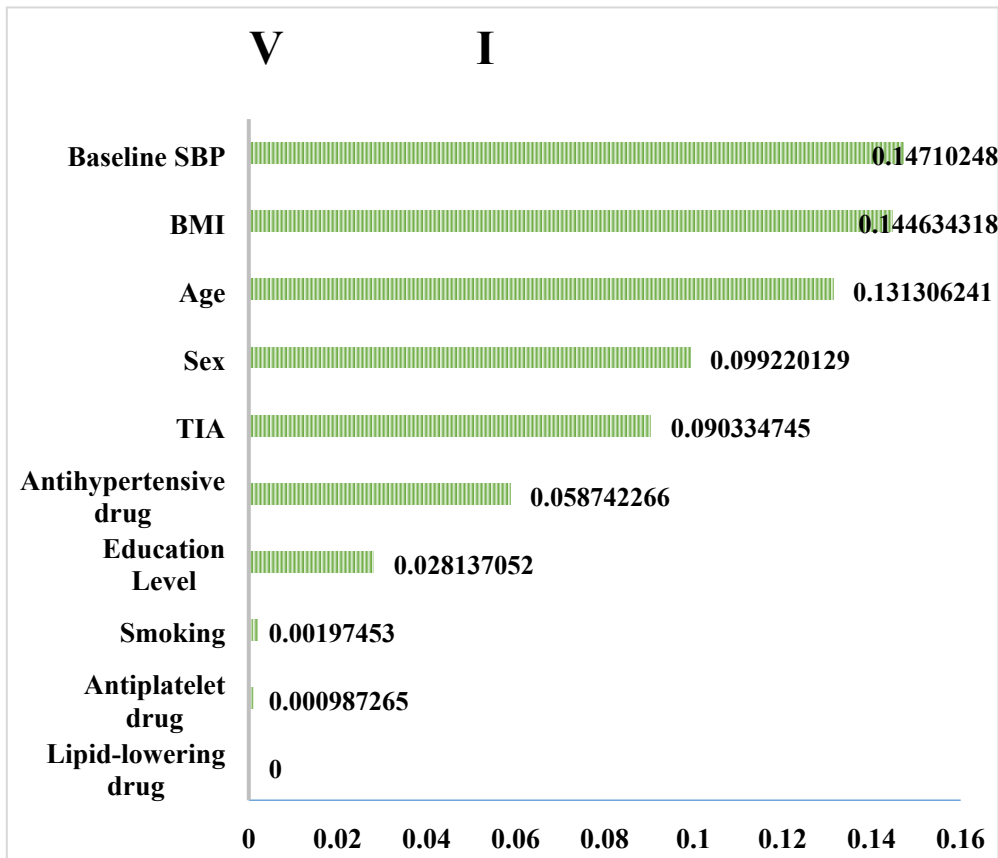

Supplementary Figure S6. Evaluation of variables importance.

(BMI, body mass index; SBP, systolic blood pressure; TIA, transient ischemic attacks.)
